# Supplementary material for: Relationship between erythema effective UV radiant exposure, total ozone and cloud cover in southern England UK: 1991–2015
Source: Copernicus journal article supplement (doi:10.5194/acp-2018-828), 2018-09-06
Supplement: Supplementary file [file acp-2018-828-AC5-supplement.pdf]

1 **Relationship between erythema effective UV radiant exposure, total ozone and cloud**  
2 **cover in southern England UK: 1991-2015**

3 Nezahat Hunter, Rebecca. J. Hooke, Michael P. Higlett, John B. O'Hagan and Richard G.E.  
4 Haylock

5 Public Health England, Chilton, Didcot, Oxfordshire, OX11 0RQ United Kingdom

6 Correspondence to: Nezahat Hunter (Nezahat.Hunter@phe.gov.uk)

7 **Abstract**

8 The long-term trend over 25 years of solar ultraviolet radiation measurements at Chilton in the  
9 south of England (51.6 N°, 1.3 W°) has been investigated. Changes in erythema effective UV  
10 radiant exposure ( $H_{er}$ ) have been studied in relation to total ozone and cloud cover by examining  
11 variation in the monthly mean deviation data.

12 A statistical analysis of the results shows that the long-term variability of  $H_{er}$  can be best  
13 characterised in two sub-periods. In the first period between 1991 and 2004, it has been found  
14 that  $H_{er}$  measurements have indicated a small and a statistically significant increasing linear  
15 trend of 1.01% per year (95% CI: 0.75%; 1.27%), while during the second period, between 2004  
16 and 2015,  $H_{er}$  values have shown a statistically significant decreasing linear trend of 1.35% per  
17 year (95% CI: -1.98%; -0.77%). Changes in  $H_{er}$  in relation to the combined effect of total ozone  
18 and cloud cover in southern England have been investigated. Both cloud cover and total ozone  
19 were found to have a highly statistically significant influence on  $H_{er}$ . These data show that the  
20 Radiation Amplification Factor (RAF) relates for sunburn of human skin is -1.03 at constant levels  
21 of cloud cover that is for every additional 1.0% increase in total ozone,  $H_{er}$  decrease by 1.03%.  
22 Over the period 1991-2004, cloud cover has explained the largest variation in  $H_{er}$  (47%), whilst  
23 total ozone has explained only 8% of the changes in  $H_{er}$ . For the second period 2004-2015, this  
24 pattern is reversed with total ozone having a greater effect on  $H_{er}$  variation (33%) than cloud  
25 cover (16%). When the data have been examined separately for each season, the largest  
26 correlation between  $H_{er}$  and total ozone and cloud cover was found during spring for both sub-  
27 periods.

28 This study provides robust evidence that both increasing trend for the first period (1991-2004)  
29 and decreasing trend for the second period (2004-2015) in  $H_{er}$  occur at the same time as  
30 increasing total ozone. However, increasing trend in  $H_{er}$  over the first period is more strongly  
31 associated with the observed reduction in cloud cover, while there is no significant change in  
32 cloud cover over the second period that  $H_{er}$  is decreasing. All these changes are small and  
33 occur within a variable signal.

34 **1 Introduction**

35 Ultraviolet radiation (UVR) is only a small portion of the radiation we receive from the sun, but  
36 has become a topic of increasing concern because of the harmful health effects it can cause.  
37 Stratospheric ozone is a naturally-occurring gas that filters the sun's ultraviolet (UV) radiation. It  
38 absorbs most of the shorter wavelength UV-B radiation, whereas longer wavelength UV-A  
39 radiation mostly passes through the ozone layer and reaches the ground (WMO 2014).  
40 However, in the mid-1970s it was discovered that the release of man-made chlorine-containing

41 chemicals could cause stratospheric ozone depletion. In subsequent years temporary ozone  
42 holes appeared over the Antarctic and to lesser extent in the Arctic (Farman et al., 1985). It was  
43 also observed that stratospheric ozone depletion also extended over populated areas, particular  
44 in spring when the ozone layer over Antarctica is dramatically thinned over Australia (Gies et al.,  
45 2013). Since the late 1970s, the effects of ozone depletion on UVR have been the subject of a  
46 large number of studies published in the literature. These studies have demonstrated that the  
47 ozone level decreased up to the mid-1990s which resulted in an increase in the amount of UV  
48 radiation reaching the Earth's surface (WHO 2006). Concern was raised that in the long-term  
49 ozone depletion would result in significantly increased UVR which in turn may result in increased  
50 incidences of skin cancers, particularly melanoma. An increase in UVR can also result in an  
51 increase in sunburn, ocular pathologies, premature skin aging and a weakened immune system  
52 (UNEP 2010; WHO 2006; AGNIR 2002; Norval et al., 2011, Lucas et al., 2010). However, it is  
53 known that exposure to UVR can be beneficial to health by producing vitamin D, which promotes  
54 healthy bones and may help in the prevention of certain diseases including heart diseases and  
55 cancers (Holick 2007, McKenzie et al., 2009, Young 2009, Epplin & Thomas 2010).

56 The Montreal Protocol came into effect in 1989, banning multiple substances responsible for  
57 ozone depletion, and by the mid-2000s it had become apparent that a decline in total ozone had  
58 stopped at almost all non-polar latitudes since around 1997 (WMO, 2007). However, the pace of  
59 the recovery is affected by changes in temperatures, circulation, and the nitrogen and hydrogen  
60 ozone-loss cycles (Waugh et al., 2009). The ozone level has remained relatively unchanged  
61 since 2000 with most studies reporting a plateau or a limited increase in total ozone (WMO  
62 2014).

63 The most important factor affecting UVR at the earth's surface is the elevation of the sun in the  
64 sky - this causes terrestrial UVR to vary with time of day, day of the year and with geographical  
65 location (Diffey, 2002). Aside from solar elevation, the most significant factors affecting solar  
66 UVR are likely to be stratospheric ozone and cloud cover; UVR may also be affected by a  
67 number of other factors including aerosols and air pollutants; many of these factors are also  
68 influenced by climate change (Bais et al., 2011). These factors often interact with each other in a  
69 complex way and their effect on terrestrial UVR can be hard to quantify.

70 In 1990, due to the widespread concern that the depletion of the ozone layer would cause an  
71 increase in population UVR exposure and possible effects on health, the former National  
72 Radiological Protection Board (NRPB - now part of Public Health England, PHE) set up  
73 monitoring stations at three locations in the UK to measure terrestrial solar UVR (HPA 2012).  
74 The Chilton monitoring site is located in a rural area in the south-east of England at  
75 approximately 51.6° N, 1.3° W. The analysis of annual erythema effective UV radiant exposure  
76  $H_{er}$  over Chilton in 1991-2015 revealed a statistically significant increasing linear trend between  
77 1991 and 1995 and a small decreasing linear trend during 1995-2015 (Hooke et al., 2016; Hooke  
78 et al., 2017). The analyses described in this paper are complementary to those undertaken by  
79 Hooke et al., (2017), which use the same data but with methodological differences that are  
80 discussed in the course of the paper. In particular, this work focuses on whether the long-term  
81 trend of monthly  $H_{er}$  can be linked to changes in ozone depletion and cloud cover, the most  
82 significant atmospheric factors that affect terrestrial UVR.

## 83 **2 Materials and methods**

84

### 85 **2.1 Erythema effective UV radiant exposure ( $H_{er}$ )**

86 Details of the methodology for UVR monitoring at Chilton are presented elsewhere (Hooke et al.,  
87 2017). A short description of materials and methods is given here, and additional analyses using  
88 the same data are pointed out. Erythema effective UV irradiance in the wavelength range 280-  
89 400 nm is measured by Robertson-Berger meters (RB-500 and RB-501 since 2004,  
90 manufactured by Solar Light Co. Philadelphia, USA). Data from these sensors are sampled to  
91 calculate 5 minute mean values that are recorded together with the standard deviation of these  
92 readings for each 5 minute period. To convert to  $H_{er}$  per day, the erythema effective UVR  
93 irradiance data were summed up daily from half an hour before sunrise to half an hour after  
94 sunset under all weather conditions (Hooke et al., 2016). The units of  $H_{er}$  are defined as the  
95 amount of energy (joules) deposited per square meter ( $J m^{-2}$ ). The first full calendar year of  
96 measurements at Chilton began in January 1991. The daily UVR data at this site considered  
97 here are the measurements for all available days during the 25 year period from 1st January  
98 1991 to 31st December 2015.

99

100 The broadband detectors measuring erythema effective UV radiation were calibrated annually  
101 using a double-grating spectroradiometer. This spectroradiometer was calibrated and traceable  
102 to national standards. The daily radiant exposure for 22 clear days during May–October between  
103 2003 and 2015 was compared to the daily radiant exposure from the double-grating  
104 spectroradiometer and the data from the broadband detectors was found to be within 10% of the  
105 spectroradiometer data on all these days (Hooke, 2017).

106

## 107 **2.2 Total Ozone**

108

109 The ground-based instruments, Dobson Spectrophotometers, used to measure daily column  
110 ozone were at the UK Meteorological (Met) Office observatories at Camborne in Cornwall (south  
111 west of England, Latitude 50.2° N, 5.3° W) for the period 1979-2003. Ozone monitoring was also  
112 undertaken at Reading using Brewer spectrophotometers from January 2003 onwards. These  
113 instruments measure column ozone, i.e. total ozone, in which includes stratospheric ozone as  
114 well as tropospheric ozone in the atmosphere. Total ozone is measured in Dobson Units (DU).

115

116 These two time series of data from the Camborne and Reading sites can be combined into a  
117 single continuous total ozone time series (Smedley et al., 2012). Both sites are located at similar  
118 latitude and the Reading site is closer to Chilton (30km to the south-east of Chilton). The  
119 combined dataset is considered here as a surrogate for the total ozone data for Chilton over the  
120 whole period 1991 to 2015. The details of the instrumentation, the ground-based ozone data and  
121 the trend analysis of total ozone from these sites from 1979 to 2008 were published previously  
122 (Smedley et al., 2012).

123

## 124 **2.3 Cloud cover**

125

126 The HadISD dataset was created by the Met Office at the Hadley Centre in the UK, which used a  
127 sub-set of the station data held in the Integrated Surface Database (ISD) (Dunn et al., 2012 &  
128 2014). The HadISD dataset comprises various selected climate variables, including total cloud  
129 cover data that were recorded in various weather stations globally, including in the UK for 1931–  
130 2016 (Dunn et al., 2016).

131

132 Station based cloud cover data in the HadISD dataset are available in various locations for the  
133 whole of the UK. The nearest point to the PHE building in Chilton for obtaining cloud cover data  
134 is presented here at Benson-Oxfordshire (Latitude 51.6° N, 1.10° W, 15km to the north-east of

135 Chilton) and used as a surrogate value for Chilton. The cloud cover data were calculated hourly  
136 from this station's observations of total cloud amount in oktas (1 okta = cloud covering one eighth  
137 of the sky = 12.5%). The hourly time series of daily cloud cover values at Benson were obtained  
138 from the Centre for Environmental Data Analysis (CEDA) for the period between 1991 and 2015.  
139 The daily average cloud amount are used here are based on the recordings at this station from  
140 11am to 2pm GMT.

141

### 142 **2.3 Estimating trends**

143

144 Linear regression analyses were carried out to test whether the estimated slopes in this particular  
145 sample of data suggest real long-term trends in the underlying  $H_{er}$ , total ozone or cloud cover  
146 data in the UK. However, in order to assess the long term trends in  $H_{er}$ , total ozone and cloud  
147 cover time series seasonal variations have been removed from the monthly mean data. This  
148 was done by calculating the overall average  $H_{er}$ , total ozone and cloud cover for each month and  
149 then subtracting each individual value from their associated average months over the 25 years.  
150 For each data set the deviation from averages in percentage of the seasonal corrected monthly  
151 mean data was estimated. In contrast, our previously reported analyses were based on annual  
152 mean anomaly data from the daily data (Hooke et al. 2017), while the analyses performed here  
153 are monthly mean deviation data from the monthly data. Although annual data and monthly  
154 means show similar pattern, we have decided using monthly data in order to examine the effects  
155 of total ozone and cloudiness changes on the  $H_{er}$ .

156

157 Longer term variations such as the Quasi-Biennial Oscillation (QBO) and the 11-year solar cycle  
158 have not been taken into account. Since the period of the QBO is approximately 2.3 years it  
159 affects short term variability rather than long term trends. This fluctuation is small in comparison  
160 to the 25 year timescale being analysed in this paper (Harris et al., 2008; Den Outer et al., 2005).  
161 The 11-year solar cycle has a longer period and therefore has the potential to impact long term  
162 trends, however its effect on erythema effective UV levels is small (den Outer, 2005; Diffey,  
163 2002).

164

165 The trend analyses were performed from the regression analysis of the monthly mean deviation  
166 of  $H_{er}$ , total ozone or cloud cover data versus year and t-tests were used to determine whether  
167 the slopes of the fitted trend models were significantly different from zero. The shape of trend in  
168 the time series was also examined for  $H_{er}$ , total ozone and cloud cover by fitting linear and non-  
169 linear models to determine whether the observed values generally increase (or decrease) over  
170 time. Further analyses were also carried out by examining the changes in  $H_{er}$ , total ozone and  
171 cloud cover separately for each season (winter, spring, summer and autumn).

172

173 The evidence for autocorrelation in the residuals of the regression analysis was also tested using  
174 the Durbin-Watson (DW) statistic. It is a well-known method of testing if autocorrelation is a  
175 problem undermining the model's inferential suitability (e.g., assessing the confidence in the  
176 predicted value of a dependent variable). The test compares the residual for time period  $t$  with  
177 the residual from time period  $t-1$  and develops a statistic that measures the significance of the  
178 correlation between these successive comparisons (Chatfield 1996). If there was evidence for  
179 autocorrelation, a non-parametric test (distribution-free), the Mann-Kendall test (MK) was used in  
180 place of a parametric linear regression analysis, which can be used to correct temporal  
181 autocorrelation and to test if the slope of the estimated linear regression line differs significantly  
182 from zero (Mann 1945, Kendall 1975, Helsel and Hirsh 1992). If a significant trend was found  
183 from the MK test, the rate of change was calculated using the Sen's slope (SS) estimator from

184 nonparametric method (Helsel and Hirsh 1992). If the results of non-parametric analyses were  
185 similar to those results obtained by linear regression, the results from non-parametric analyses  
186 are not presented.

187  
188 The relationship between  $H_{er}$  and total ozone and cloud cover was also examined using Analysis  
189 of Variance (ANOVA) to obtain information about levels of variability within a regression model  
190 and to form a basis for tests of significance. The correlation coefficient value ( $r^2$ ) was calculated  
191 to determine a measure of the strength of the relationship between  $H_{er}$  and cloud cover and  
192 ozone and to quantify how much of the total variation in  $H_{er}$  could be explained by ozone or cloud  
193 cover. A significance level  $p < 0.05$  was considered statistically significant.  
194

### 195 **3 Results**

#### 196 **3.1 Erythema effective UV radiant exposure ( $H_{er}$ )**

197 Summary statistics from the daily  $H_{er}$  are presented in Table 1. Over 25 years  $H_{er}$  ranges from  
198  $10 \text{ J m}^{-2}$  (measured on 9 January 1992, 18 days after winter solstice) to  $5655 \text{ J m}^{-2}$  (measured on  
199 20 June 2003, at the summer solstice) with a mean of  $1303 \text{ J m}^{-2}$ .

200  
201 Figure 1 displays the distribution of the daily  $H_{er}$  using boxplots for each season at Chilton. Each  
202 box shows the lower 25% quartile Q1, and upper 75% quartile Q3 and central line is the median.  
203 The whiskers extended in each direction from the box starts from Q1 to the smallest data point  
204 and the upper whisker from the Q3 to the largest data point that is away from the box and  
205 measurements falling outside whiskers are possible extreme data values that are outside the  
206 typical pattern of the other data points. The observed results show that  $H_{er}$  are the highest in the  
207 summer months and the lowest in winter months, while during spring and autumn months,  $H_{er}$   
208 may change rapidly day to day (Fig.1). The extreme data points were mostly observed in winter  
209 and a few in other seasons could be related to natural variability in factors that affect  $H_{er}$   
210 including total ozone, cloud cover, aerosols, and climate at this site. In particular, extremely low  
211 total ozone periods, which often occur in late winter and early spring, while  $H_{er}$  does not exceed  
212 normal-ozone summer values. After 2007, in particular in spring, summer and autumn it appears  
213 that  $H_{er}$  values are well below their expected mean values.  
214

215 **Figure 1:** Boxplots of the daily  $H_{er}$  data for each season at the Chilton site between 1991 and  
216 2015 (grey solid line represents the mean value for each season)

217  
218 Figure 2a shows the monthly mean deviation of  $H_{er}$  values expressed as percentages. A  
219 consistent rise between 1991 and 2003 with a clear peak in 2003 when the  $H_{er}$  values were the  
220 largest recorded at Chilton over the 25 year period. Thereafter,  $H_{er}$  values appeared to decrease.  
221 Fig. 2b also shows the mean deviation data in  $H_{er}$  for each of the four seasons over the 25 year  
222 period. Winter and spring exhibited greater variability in comparison with summer and autumn.  
223 During winter months, peaks in  $H_{er}$  were observed in various years; however,  $H_{er}$  in winter was  
224 very low (Table 1) thus the effect on annual exposure is expected to be very small. Among  
225 spring months, clear peaks are observed in March 2003 and also in March & April 1997 (Fig. 2b).  
226 For summer,  $H_{er}$  levels vary less in comparison to other seasons, although summer has the  
227 highest  $H_{er}$  levels overall and the effect on annual exposure is large. For autumn, peaks are  
228 observed in November 2006 and 2007 and the variability in the last few years was stable.  
229  
230

231 **Figure 2:** Monthly mean deviation of  $H_{er}$  data at Chilton (1991-2015) with trend lines (a) all  
232 season combined (b) seasonal.

233

234 The regression analyses of  $H_{er}$  data indicate that the best fitting single linear trend covering the  
235 whole period 1991-2015 has a downward slope but that this slope is not statistically significantly  
236 different from a constant value over the period ( $p=0.27$ ). Two further models were also  
237 examined. One is a linear-quadratic function, (LQ), a 2<sup>nd</sup> degree polynomial, which allows for  
238 more gradual variation in the monthly  $H_{er}$  across the 25 year period and a second model consists  
239 of two linear trends with a node to allow for a single change in linear trend over the 25 year  
240 period. Figure 2a also shows the results of fitting these four models to the monthly mean  
241 deviation of  $H_{er}$  data.

242

243 The best fitting model was the last of these which had two linear trends that describe an  
244 increasing trend from 1991 to 2003 and a decreasing trend thereafter which defines the year  
245 2003 as the node between two trend lines. The nodal year appeared to be influenced by the  
246 particularly high observations in 2003 (Fig. 2a). Thus, in order to avoid bias that might be caused  
247 by the highest  $H_{er}$  values observed in 2003, the year 2004 was chosen to be the nodal point in  
248 preference to 2003.

249

250 Based on the results of the initial model fitting to the whole period statistical analyses were also  
251 carried out to investigate the long-term variability of  $H_{er}$  for two sub-periods (1991-2004 and  
252 2004-2015). Table 2 presents the estimated linear slopes in percentage change per year in  $H_{er}$   
253 with 95% confidence intervals (CI) and p-values of the associated significance tests. There is  
254 evidence of a statistically significant increasing trend for the first period (1991- 2004) with a mean  
255 rate of 1.01% per year ( $y^{-1}$ ) (95% CI: 0.75%; 1.27%,  $p<0.001$ ) and a decreasing trend for the  
256 second period (2004-2015) with a mean rate of 1.35%  $y^{-1}$  (95% CI: 1.98%; 0.72%,  $p<0.001$ )  
257 based on all the data. While there was evidence of autocorrelation, the results of the non-  
258 parametric analyses, which would not be influenced in the same way by the autocorrelation, were  
259 similar to those in Table 2 so they are not presented here.

260

261 For seasonal trends, the only significantly increasing linear trend was seen in winter from 1991-  
262 2004; however,  $H_{er}$  level in winter was very low and contributed only a small proportion of the  
263 total  $H_{er}$  overall. The highest levels of  $H_{er}$  observed in summer did not show any significant linear  
264 trend for 1991-2004 as the  $H_{er}$  levels were steady for this period. The absence of a significant  
265 trend in spring for this period might be partly explained by the influence of fairly stable  $H_{er}$  levels  
266 seen between 1998 and 2002 (Fig.2b). Across the same period in autumn, the trend was found  
267 to be approaching statistical significance ( $p=0.07$ ). For 2004-2015, the estimated trend slope  
268 was negative for each season, but the trend was only statistically significant in summer and  
269 autumn, (Table 2).

270

271

## 272 **3.2 Total ozone**

273 From the combined Camborne and Reading dataset covering the period 1991-2015 total ozone  
274 ranged from a low of 177 DU (measured in January 2006 in Reading) to a high of 524 DU  
275 (measured in February 1991 in Camborne) with an overall mean value of 327 DU. The  
276 distribution of the daily total ozone values are presented in box plots for the period 1991-2015 for  
277 each season (Fig. 3a). The mean value is shown with a grey dashed line and the bold line at  
278 300 DU shows the average amount of total ozone in the atmosphere  
279 (<http://ozonewatch.gsfc.nasa.gov>). Both graphs displayed a large spread of total ozone

280 measurements. The data appear to be varying year to year and there is a much larger spread of  
281 total ozone values in winter and spring compared to summer and autumn. The extreme data  
282 points are therefore not likely to be erroneous readings. The total ozone values were low in  
283 autumn and early winter days with a few exceptional cases in March, April and August.  
284 Similarly, the maximum total ozone values were mostly found in late winter and in early  
285 spring (Fig. 3b); the solid black line indicates the overall mean value (327 DU) and the grey  
286 dashed line represents the baseline ozone level of 220 DU which was not observed over  
287 Antarctica prior to 1979 (<https://ozonewatch.gsfc.nasa.gov>).

288  
289

290 **Figure 3:** Daily total ozone values: (a) Box plots for each season for the period (1991-2015) at  
291 southern England, (b) Line plots for the period 2005-2015 at Reading.

292 Table 3 presents the estimates of the linear slopes in percentage change per year in total ozone  
293 data with 95% confidence intervals (CI). The regression analysis of the trend for the period  
294 1991-2015 showed a highly statistically significant increasing linear trend of  $0.17\% \text{ y}^{-1}$  (95% CI:  
295  $0.09\%$ ;  $0.25\%$ ,  $p < 0.001$ ). The evidence for autocorrelation in the residuals of this regression  
296 analysis was tested and the DW test confirmed that the overall level of autocorrelation in the  
297 residuals was highly statistically significant ( $p < 0.001$ ). Applying the non-parametric MK test to  
298 these data also indicated a strongly statistically significant increasing trend in the total ozone  
299 across the full study period and the Sen's slope median trend estimate was  $0.13\% \text{ y}^{-1}$  (95% CI:  
300  $0.05\%$ ;  $0.21\%$ ,  $p < 0.001$ ). This slope estimate was smaller than that obtained by the linear  
301 regression analysis (Table 3).

302 A model consisting of two trend lines with a node at 2004 was fitted to these data and the results  
303 are shown in Table 3. The regression analysis gave slightly different results to those obtained  
304 using the non-parametric methodology. The regression analysis found an increasing trend of  
305  $0.19\% \text{ y}^{-1}$  in total ozone for the period 1991-2004 which was borderline statistically significant  
306 ( $p = 0.06$ ) and a statistically significant ( $p = 0.03$ ) upward trend for 2004-2015 with a value of  $0.28\%$   
307  $\text{y}^{-1}$  (95% CI:  $0.003$ ;  $0.53$ ). The non-parametric test also showed that the slope of the trend during  
308 1991-2004 was positive ( $0.16\% \text{ y}^{-1}$ ; 95%CI:  $-0.02$ ;  $0.35$ ), but not statistically significant ( $p = 0.09$ ),  
309 while in the latter period the slope trend was positive,  $0.22\% \text{ y}^{-1}$  (95% CI:  $0.002\%$ ;  $0.44\%$ ), but  
310 this result was of borderline statistical significance ( $p = 0.05$ ).

311 The comparable analyses of the seasonal data are also presented in Table 3. The trend for the  
312 total ozone data was only statistically significant in winter over the period 1991-2015 ( $0.43\% \text{ y}^{-1}$ ;  
313 95% CI:  $0.19\%$ ;  $0.67\%$ ,  $p < 0.001$ ). While there was evidence for autocorrelation in the residuals,  
314 Sen's slope trend estimates were found to be very similar to the slope estimates obtained by  
315 linear regression. However, there were no statistically significant positive trends identified for  
316 any of the seasons either for the first period 1991 to 2004 or for the second period 2004 to 2015  
317 and the 95% confidence interval lower bounds were negative for all seasons. In particular, in  
318 summer, a statistical analysis showed that ozone trend was not statistically significant with there  
319 being very small when  $H_{\text{er}}$  was high over any time periods. The significant ozone trends in winter  
320 will influence the very low  $H_{\text{er}}$  at that time of year, but have a little practical influence on overall  
321 annual dose of  $H_{\text{er}}$ .

### 322 3.3 Erythema effective UV radiant exposure ( $H_{\text{er}}$ ) and total ozone

323 Further analyses were carried out to examine the relationship between  $H_{\text{er}}$  and the ground-based  
324 ozone. Fig. 4 shows that the relationship between  $H_{\text{er}}$  and total ozone appears to be an inverse

325 one with  $H_{er}$  being high when total ozone is low and vice versa. This is evident for all seasons  
326 (Fig.4b). The greater variability in  $H_{er}$  observed, in particular in winter and spring, appears to be  
327 caused by the greater variability of total ozone for the same seasons (Fig.4a). However,  $H_{er}$   
328 effect was negligibly small in winter and might be significant in spring if the total ozone events get  
329 low. An inverse relationship was also observed in summer and in autumn, but not to the same  
330 extent as that seen in winter and spring. Particular fluctuation in total ozone and  $H_{er}$  values was  
331 observed after 2007 for each season; higher values of total ozone and lower values of  $H_{er}$  were  
332 seen and the same pattern was also observed from December 2011 to March 2012. However,  
333 the highest  $H_{er}$  values recorded at Chilton over the 25 year period were recorded in 2003 and  
334 there was not any significant total ozone reduction in the same year. In contrast, higher values of  
335 ozone and lower values of  $H_{er}$  were seen from November 2009 to January 2011. The recent  
336 years from April 2012 to December 2015, the ozone level appeared to be stayed higher, while  
337  $H_{er}$  level remained low. In absolute terms, all these observed changes are small and implications  
338 for  $H_{er}$  in winter are insignificant.

339

340 **Figure 4:** Relationship between monthly mean deviation of  $H_{er}$  (1991-2015) and the total ozone  
341 data (1991-2015): (a) seasonal, (b) the fitted linear regression line with 95% CI.

342 Table 4 shows the results of the regression analyses of the monthly mean deviation of  $H_{er}$   
343 against the total ozone by season and for all seasons together for the period 1991-2015 and the  
344 correlation coefficient estimates ( $r^2$ ) for each regression model. The inverse correlation between  
345  $H_{er}$  and total ozone was found to be strongly statistically significant ( $p < 0.001$ ) for the period 1991-  
346 2015 such that a 1.0% increase in total ozone was associated with a 1.3% decrease in  $H_{er}$ , that  
347 is the Radiation Amplification factor (RAF) for the erythemal action spectrum for sunburn of  
348 human skin and the RAF is about -1.3. The scatterplot between  $H_{er}$  and ozone in Figure 4b also  
349 shows this fitted regression line in which there is a wide spread of data points around the line  
350 indicating a weak correlation which was confirmed by an  $r^2$  value of 25%. However 75% of the  
351 variation could not be explained by total ozone alone and that other factors such as cloud cover  
352 and aerosols are likely to be important.

353

354 The results for the two-sub periods 1991-2004 and 2004-2015 are also presented in Table 4. A  
355 statistically significant negative correlation was also found between  $H_{er}$  and total ozone ( $p < 0.001$   
356 for both periods. The estimated slope was negative for both periods; that is  $H_{er}$  was seen to  
357 decrease by 1.2% and 1.5% for a 1% increase in total ozone from 1991 to 2004 and for 2004-  
358 2015 respectively. These RAF values are slightly different than that RAF for the full study period  
359 (1991-2015), but a test of heterogeneity in three RAF values showed that there was no  
360 statistically significant difference in them ( $p = 0.68$ ). The corresponding correlation coefficients  
361 were found to be weak (18% and 33% respectively) indicating that other factors were also  
362 influencing the variation of  $H_{er}$  over these periods as mentioned earlier.

363

364 For the seasonal data, the inverse correlation between  $H_{er}$  and total ozone was also highly  
365 statistically significant ( $p < 0.001$ ) for 1991-2015 (Table 4). The highest correlation between  $H_{er}$   
366 and total ozone arose in spring (41%) and summer (34%). A 1% increase in total ozone during  
367 spring and summer seasons leads to an average of 2.4% and 1.9% decrease in  $H_{er}$  respectively.  
368 The RAF in winter is less negative than that in summer, spring and autumn. This pattern is not  
369 surprising as an increase in cloudiness tends to reduce  $H_{er}$  and as a result the RAF become less  
370 negative in winter. There was no statistically significant difference between RAF values in  
371 summer, spring and autumn ( $p = 0.82$ ) and also between winter and autumn ( $p = 0.35$ ). Across  
372 both sub periods, the inverse correlation between  $H_{er}$  and total ozone was statistically significant  
373 for all seasons except during winter for the period 1991-2004 ( $p = 0.12$ ). In contrast, for the period



374 2004-2015, there was no statistically significant difference in RAF values for the different  
375 seasons and the correlation was stronger in winter (52%) and also in spring (48%) than that in  
376 summer (24%) and autumn (17%), although the  $H_{er}$  level in winter is very low and the effect of  
377 total ozone is negligible. The results for both study periods also showed the lowest RAF values  
378 were estimated in spring and summer. The daily mean value of  $H_{er}$  in summer here is about 14  
379 times larger than in winter.

380

### 381 **3.4 Erythema effective radiant exposure ( $H_{er}$ ) and cloud cover**

382

383 The long term changes in  $H_{er}$  in all weather conditions also differ according to variations in cloud  
384 cover. The regression analysis of all the cloud cover data showed a statistically significant  
385 downward linear trend with a mean rate of  $0.19\% \text{ y}^{-1}$  (95% CI: -0.34%; -0.04%,  $p=0.01$ ). When  
386 the data for each season was considered separately, a statistically significant downward linear  
387 trend was only found in spring ( $p=0.025$ ) although the trend slope was negative for the other  
388 three seasons. The regression analysis of cloud cover for the first period (1991-2004) also  
389 showed a statistically significant downward linear trend of  $0.68\% \text{ y}^{-1}$  (95% CI: -1.03; -0.33,  
390  $p=0.0002$ ), but for 2004-2015 the downward linear trend was small ( $-0.04\% \text{ y}^{-1}$ ) and not  
391 statistically significant ( $p=0.85$ ). Seasonally, the slope estimates were negative for all four  
392 seasons for 1991-2004, but only the trends for winter and spring were statistically significant ( $-$   
393  $0.93\% \text{ y}^{-1}$ ,  $p=0.02$  and  $-0.72\% \text{ y}^{-1}$ ,  $p=0.03$  respectively). In contrast, for 2004-2015, there was no  
394 evidence of a trend in cloud cover for any season, although the trend estimate was negative for  
395 winter and spring, but positive for summer and autumn.

396 Fig.5 shows the relationship between cloud cover and  $H_{er}$  for the period 1991-2015. As expected  
397 an inverse relationship was observed and peak  $H_{er}$  was seen to increase in response to  
398 decreasing cloud cover for all seasons.

399

400

401 **Figure 5:** Relationship between the mean deviation of  $H_{er}$  (%) and the cloud cover at Chilton  
402 (1991-2015): (a) seasonal, (b) correlation plot showing the linear regression line with 95% CI.

403 Table 5 shows the results of the regression analyses of the monthly mean deviation of  $H_{er}$  data  
404 against cloud cover and the correlation coefficient values to quantify the strength of the  
405 relationship by season and for all seasons together at Chilton from 1991 to 2015. A highly  
406 statistically significant inverse correlation was found for each season and for all seasons  
407 together. For the whole data over the period 1991-2015 the analysis shows a 1% increase in  
408 cloud is associated with a decrease of about 1% in  $H_{er}$ . This fitted regression line on a scatterplot  
409 (Fig.5b) indicates modest correlation between total ozone and  $H_{er}$  which was confirmed by an  $r^2$   
410 value of 38% (Fig. 5b) and over 62% of the variation remaining unexplained. Seasonally, the  
411 highest correlations were observed in spring (48%) and summer (46%) over the period 1991-  
412 2015.

413

414 A statistically significant negative correlation was also found for the whole data for the two-sub  
415 periods 1991-2004 and 2004-2015 ( $p<0.001$  for both periods) and the results are also presented  
416 in Table 5. While the regression slopes were similar for both periods the strength of the  
417 correlation was moderate (48%) for the first period, but low for the latter period (27%). For the  
418 seasonal data, all regression slope values were negative and statistically significant. The  
419 correlation was strongest in spring (66%) and summer (64%) for 1991-2004, but moderate for the  
420 same seasons for 2004-2015.

421

### 422 **3.5 H<sub>er</sub>, total ozone and cloud cover**

423 A multiple linear regression analysis was used to investigate how variation in cloud cover and  
424 total ozone considered together were associated with changes in H<sub>er</sub> from 1991 to 2015. The  
425 results are presented in Table 6. The estimated slopes for both cloud cover and total ozone  
426 were negative and statistically significant for all seasons together. On average H<sub>er</sub> decreased by  
427 0.82% for each additional 1% increase in cloud cover at constant levels of total ozone. Similarly  
428 for every additional 1% increase in total ozone, H<sub>er</sub> decreased by 1.03% at constant levels of  
429 cloud cover. This RAF value is slightly different than the model with no adjustment cloud cover  
430 effect, but not statistically significant different ( $p=0.50$ ). The correlation coefficient ( $r^2$ ) was  
431 moderate (51%) for all seasons together, of this total variation in H<sub>er</sub> was explained by these two  
432 factors together, with 37% accounted for by cloud cover variation and 14% by total ozone  
433 variation.

434

435 Across the season specific analyses, the correlation between H<sub>er</sub> and these two factors was  
436 highest in spring (68%) and summer (55%) (Table 6). In both instances cloud cover accounted  
437 for the largest variation in H<sub>er</sub> (47% and 46% respectively), while the variation in H<sub>er</sub> explained by  
438 total ozone was low (21% and 12% respectively) when cloud cover was in the model. This  
439 means that 32% and 45% of variation in H<sub>er</sub> in spring and summer respectively remained  
440 unexplained. As expected, the correlation coefficient for winter was the lowest (42%) while for  
441 autumn the correlation between H<sub>er</sub> and these two factors was found to be moderate (51%) with  
442 variation in cloud cover accounting for 41% and total ozone explaining only 10% of the total  
443 variation in H<sub>er</sub>.

444

445 Table 7 shows the results from the multiple linear regression analysis for two-sub periods (1991-  
446 2004 and 2004-2015). For the first period, H<sub>er</sub> decreased by 0.97% for each additional 1%  
447 increase in cloud cover at constant levels of total ozone. Similarly, for every 1% increase in total  
448 ozone, H<sub>er</sub> decreased by 0.79% at constant levels of cloud cover. These RAF values are slightly  
449 different than that the period 1991-2015, but there was no statistically significant difference in the  
450 RAF values ( $p=0.66$ ). For 1991-2004, 55% of the total variation in H<sub>er</sub> was explained by cloud  
451 cover and total ozone together. Cloud cover accounted for 47% of the total while total ozone  
452 explained only 8%.

453

454 In contrast, for the period 2004-2015, of the 49% of the variation in H<sub>er</sub> explained by both factors,  
455 33% was explained by total ozone and 16% by cloud cover. The H<sub>er</sub> level decreased by 0.65%  
456 for each additional 1% increase in cloud cover at constant levels of total ozone while for every  
457 1% increase in total ozone, H<sub>er</sub> decreased by 1.25% at constant levels of cloud cover.

458

459 The season specific results showed similar negative trends. The highest correlation for the period  
460 1991-2004 was observed in spring (82%). Of this total 65% was explained by cloud cover and  
461 17% by total ozone. In contrast, the highest correlation value for 2004-2015 was found in winter  
462 (67%). Of this total variation cloud cover explained 15% of the variation in H<sub>er</sub>, while total ozone  
463 explained 52%, a much larger contribution. For summer and autumn, cloud cover was found to  
464 be the larger influence to the variation in H<sub>er</sub> (31% and 26%, respectively) in comparison with  
465 total ozone (10% and 11%, respectively).

466

## 467 **4 Summary and Discussion**

468

### 469 **4.1 Erythema effective UV radiant exposure (H<sub>er</sub>)**

470

471 This paper reports an analysis of the effect of total ozone and cloud cover on the erythema  
472 effective UV radiant exposure ( $H_{er}$ ) at Chilton between 1991 and 2015. During this period the  
473 highest  $H_{er}$  levels were observed in 2003. This peak was likely to be due to the exceptionally hot  
474 spring and summer with low cloud cover at the site during that year, but not with any significant  
475 reduction in total ozone level. It was also the same year that a heat wave affected much of  
476 Western Europe including England (Vieno et al., 2010; Beniston 2004). However, hot weather  
477 does not necessarily mean high UVR and cold weather does not necessarily mean low UVR  
478 (Wong et al 2015). High levels of  $H_{er}$  were also reported at two sites, Lindenberg in Germany and  
479 at Bilthoven in Holland (den Outer et.al. 2005; WMO et. al 2007) in 2003. These site are at  
480 latitudes ( $49^{\circ}$  N,  $52^{\circ}$  N respectively) which are close to that of Chilton ( $52^{\circ}$  N). Den Outer &  
481 colleagues suggested that the high annual erythema effective UV dose received in Holland in  
482 2003 was associated with extremely low cloud levels combined with moderately low ozone  
483 values. However, no such associations were reported at Uccle in Belgium with a latitude of  $51^{\circ}$   
484 (De Bock et al., 2014) or at Reading in the UK (Smedley et al., 2012).  $H_{er}$  data at Chilton also  
485 showed a reversal in trend before and after 2003 with an increasing trend from 1991 to 2003 but  
486 a decreasing trend thereafter. In order to avoid bias in the analyses caused by the highest  $H_{er}$   
487 values occurring in 2003, the year 2004 was chosen to be the change in point in preference to  
488 2003.

489

490 In our previous analysis of the long-term variability of  $H_{er}$  between 1991 and 2015 at Chilton the  
491 data were divided into two separate time series data due to geophysical phenomena; one from  
492 1991 to 1995 during which the ozone turning point in the mid-1990s because excess volcanic  
493 aerosol after the Pinatubo volcanic eruption may cause short-term ozone depletion and as a  
494 result enhanced the amount of UVR (WMO 2014) and a second from 1995 to 2015 (Hooke et al.,  
495 2017).

496

497 In contrast, this current work splits the time series according to statistical analysis; we have  
498 shown that the  $H_{er}$  data for 1991-2015 (based on a nonlinear model over the full period) were  
499 statistically better described by two linear trends; the first a statistically significant increasing  
500 linear trend value of  $1.01\% y^{-1}$  ( $p < 0.0001$ ) for 1991-2004 and the second a statistically significant  
501 decreasing trend of  $1.35\% y^{-1}$  ( $p < 0.0001$ ) from 2004 to 2015. Our finding for the first period is  
502 not consistent with our earlier result for the period 1991-1995 where a higher estimate ( $4.4\% y^{-1}$ )  
503 was obtained however the earlier result should be treated with caution due to relatively short time  
504 period, 5 years, over which the trend was calculated. Our findings for the second period agree  
505 with those of our early study for 1995-2015 but the trend estimate was slightly lower ( $0.8\% y^{-1}$ ).

506

507 The finding in this study for the first period (1991-2004) is in good agreement with those from  
508 European studies that also reported significant increasing linear trends. At Lindenberg in  
509 Germany there was reported an increasing trend of  $0.77\% y^{-1}$  during 1996-2003,  $0.85\% y^{-1}$  for the  
510 period 1999-2004 and  $1.4\% y^{-1}$  over the period 1998-2005. The studies at Norrköping in Sweden  
511 (with a latitude of  $58^{\circ}$ ) and also at Bilthoven in Holland, both reported an increasing trend during  
512 1996-2004 ( $1.2\%$  and  $0.86\% y^{-1}$  respectively) based on solar zenith angles (SZA) of  $60^{\circ}$ , but the  
513 trend was higher ( $1.7\% y^{-1}$ ) at Bilthoven for the period 1998-2005 when the noon values of the  
514 erythemal UV radiation were used (Bais et al., 2007). The study at the Hoher Sonnblick site in  
515 Austria (Fitzka et al., 2012) showed a significant upward trend in the erythemally weighted  
516 irradiance for the period 1997-2011 with a range from  $0.84\% \pm 5.2\% y^{-1}$  at  $45^{\circ}$  SZA to  
517  $1.26\% \pm 0.36\% y^{-1}$  at  $65^{\circ}$  SZA under all weather conditions. However, a smaller and less  
518 significant result was seen at wavelengths of 305 nm (between  $-0.76\% \pm 1.13\% y^{-1}$  and  $0.79\% \pm$

519 0.73%  $y^{-1}$ , depending on SZA). The study based at Reading in the UK found a significant  
520 increasing linear trend (0.66% per year) for the period from 1993 to 2008 based on the midday  
521 values of UV index (Smedley et. al 2012).

522  
523 The trend in  $H_{er}$  in this study over the second period (2004-2015) at Chilton is consistent with  
524 values derived for the averaged UV-B data over Canada, Europe and Japan that showed  
525 statistically significant evidence of a reduction in UV-B for the period 2007-2011 with the slope  
526 estimates ranging from -1.5% to -2% under cloudless conditions (Zerefos et al., 2012). Our  
527 findings are also in good agreement with the results of Fountoulakis et al. (2016) at Thessaloniki  
528 (latitude of 40° N) in Greece, where a turning point in the trends of UV irradiance is reported as  
529 being in 2006; a statistically significant increasing trend of 0.71%  $\pm$  0.21%  $y^{-1}$  for the period 1994-  
530 2006 and a decreasing trend of 0.33%  $\pm$  0.32%  $y^{-1}$  from 2006 to 2014 but the trend was not  
531 statistically significant. It appears that there is a similar behaviour of the trend in the UV  
532 irradiance between this UK study and the Greek study, although these countries differ  
533 significantly in terms of climate and location. However, a recent study at Uccle in Belgium  
534 covering the period 1991-2013 which is similar to that examined in this study found a strongly  
535 statistically significant increasing linear trend of 0.7%  $y^{-1}$  (De Bock et.al. 2014). In comparison,  
536 our results for the period 1991-2015 found a non-significant downward trend.

537  
538 When the  $H_{er}$  data for each season were analysed separately, a statistically significant increasing  
539 trend was only found during winter for the first period 1991-2004 despite large inter-month  
540 variability and contributes only a small fraction of the annual cumulative  $H_{er}$  level in the UK. Much  
541 of this significant result might be caused by the excess of low total ozone events observed in  
542 winter (detail will be discussed in the next section). However, there was no significant linear trend  
543 in  $H_{er}$  in either spring or in summer at Chilton. The absence of a significant trend in spring for  
544 this period might be due to higher values of total ozone level over the same period.

545  
546 For the second period 2004-2015, a linear downward trend in  $H_{er}$  was observed for all four  
547 seasons, but the trend was only statistically significant in summer and autumn. The results of the  
548 current study are comparable with those of the Belgian study at the Uccle site from 1991 to 2013,  
549 that showed the largest statistically significant increasing trend in  $H_{er}$  in spring but a negative  
550 trend in winter, albeit not statistically significant (De Bock et. al 2014). In addition, the Austrian  
551 study at the Hoher Sonnblick site for the period 1997-2011 also found that the largest and most  
552 significant linear trends were during winter and spring.

#### 553 554 **4.2 Erythema effective UV radiant exposure ( $H_{er}$ ) and total ozone**

555  
556 The significantly increasing trend in total ozone of 0.13%  $y^{-1}$  ( $p < 0.001$ ) in the south of England  
557 between 1991 and 2015, could be due to natural variability in total ozone. This result is lower but  
558 in general good agreement with the significant upward trend reported in European studies: the  
559 estimated trend at the Hoher Sonnblick site in Austria during 1997-2011 was 0.19%  $y^{-1}$  (Fitzka et  
560 al., 2012) and at the Uccle site in Belgian during 1991-2013 the trend was 0.26%  $y^{-1}$  (De Bock et.  
561 al., 2014). Our finding is also consistent with the result for the period 1995-2011 over Canada,  
562 Europe and Japan (Zerefos et al., 2012). The Reading study, however, using a subset of the  
563 same total ozone data used here reported a small average increase after 1993, but the trend  
564 was not statistically significant from 1993 to 2008 (Smedley et al., 2012). However, the authors  
565 noted a small average increase that lies within the range of trends observed at other European  
566 stations (Smedley et al., 2012). The analysis of seasonal data found a much larger spread of  
567 ozone measurements in winter and spring months compared to those in summer and autumn for  
568 the period 1991-2015. The largest and most significant increasing linear trend was found during

569 winter. While there was an upward trend in other seasons it was markedly smaller and not  
570 significant. The Reading study did not show any significant trend for any season although an  
571 increasing rate in winter was noted for the period 1993-2008. Unlike this study, the Belgian study  
572 at the Uccle site only found statistically significant increasing linear trends of ozone in spring and  
573 summer for the period 1991-2013 (De Bock et al., 2014). The trend estimates were quite  
574 variable between these studies and depend on what period was chosen and therefore comparing  
575 these estimates across studies should be treated with caution.

576 We examined whether the long-term behaviour of the measured  $H_{er}$  could be explained by total  
577 ozone variation. Between 1991 and 2015, while there was a statistically significant inverse  
578 relationship between total ozone and  $H_{er}$  ( $p < 0.001$ ), the total ozone has a weak inverse linear  
579 correlation with  $H_{er}$  (25%). This is not surprising as the amount of UV radiation reaching the  
580 Earth's surface depends not only total ozone but also cloud cover, atmospheric aerosols, air  
581 pollution and other climate factors (Calbó et al., 2005). The relationship between changes in  $H_{er}$   
582 and total ozone is expressed with the radiation amplification factor (RAF) for sunburn of human  
583 skin and this study was found to be the RAF was about -1.3. This value is in good agreement  
584 with the reported RAF of -1.1 in the US study (Hall 2017) and the RAF values ranging from -1.3  
585 to -1.4 in Spain (Antón et al. 2009).

586  
587 To better compare the variation in  $H_{er}$  with that of total ozone two linear trends with a node at  
588 2004 were fitted to the ozone data. The trend for total ozone was positive, but not statistically  
589 significant ( $p = 0.09$ ) for the period 1991-2004, but there was a strong statistically significant  
590 increase of in  $H_{er}$  over the same period. In contrast, for the second period 2004-2015, the trend  
591 for total ozone showed a borderline statistically significant increasing linear trend ( $p = 0.05$ ) but the  
592  $H_{er}$  trend showed a significant decrease over the same period.

593  
594 For both sub-periods (1991-2004 and 2004-2015) a statistically significant inverse correlation  
595 was observed between  $H_{er}$  and total ozone, but the amount of variation in  $H_{er}$  explained by that of  
596 total ozone was low (18% and 33% for each time period respectively). Our estimates of the size  
597 of the trend in ozone are smaller than those reported in the study by Zerefos et al., (2012) based  
598 on averaged total ozone and UV-B data over Canada, Europe and Japan. That study found that  
599 for the period 2007-2011 the effect of increasing total ozone on UV-B values was about -4%  
600 when aerosol optical depth (AOD) was factored into the model. The Belgian study (De Bock et  
601 al., 2014) also reported a greater effect of total ozone on the erythemal UV dose (-5%) during the  
602 period 1991-2008 when measures of global solar radiation and AOD were taken into account.  
603 The Reading study, however, did not find any correlation between the surface UV radiation and  
604 total ozone for the period 1993-2008. The authors suggested that the majority of the variability in  
605 UV radiation was due to changes in cloud cover and other effects (Smedley et al., 2012).

606  
607 Examining our data on a season by season basis over the whole period from 1991 to 2015, we  
608 found a highly negative slope estimate for each season. However there were some differences in  
609 how much of the variation in  $H_{er}$  that was explained by total ozone across the seasons. In spring  
610 and summer the variability explained was moderate at 41% and 34% respectively but in winter  
611 and autumn it was considerably lower at 19% and 21% respectively.

612  
613 Restricting the data to the first period (1991-2004), we also saw the greatest impact of total  
614 ozone on  $H_{er}$  in spring (37%) and summer (42%) but for the second period (2004-2015), the  
615 impact was bigger in winter (52%) and spring (48%) than that in summer (24%) and autumn

616 (17%). This is mainly due to the strong inverse relationship between  $H_{er}$  and ozone that was  
617 observed during spring and winter in the period 2008- 2015 (63% and 56% respectively).  
618

### 619 **4.3 Erythema effective UV radiant exposure ( $H_{er}$ ) and cloud cover**

620  
621 Cloud cover can have a marked impact on the amount of UVR that reaches the earth's surface.  
622 An increase in cloud cover usually results in a reduction of UV radiation below the clouds. Whilst  
623 UVR can pass through thin and broken clouds thick clouds tend to reflect, absorb or scatter UV  
624 radiation. Puffy, fair-weather clouds deflect rays and can actually increase the UV radiation  
625 reaching the earth's surface (Alados-Arboledas et al., 2003). Our analysis of cloud cover  
626 variation showed a statistically small significant decreasing trend of  $-0.68\% y^{-1}$  ( $p < 0.001$ ) for the  
627 first period (1991-2004) but no significant trend for the second period (2004-2015) although the  
628 estimated slope was negative ( $-0.04\% y^{-1}$ ). These findings agree partly with other studies that  
629 reported a decrease in cloud cover (Norris and Slingo, 2009; Eastman and Warren, 2013) and  
630 also with those that did not find any evidence of a decreasing trend in cloud cover. For example,  
631 the studies at the Hoher Sonnblick site in Austria over the period 1997-2011 (Fitzka et al., 2012)  
632 and in the study examining data from Europe, Canada and Japan for the period 1995-2011  
633 (Zerefos et al., 2012).

634  
635 Examining our data on a season by season basis, the only statistically significant trends in cloud  
636 reduction was observed in spring and winter during the period 1991-2004. For subsequent years  
637 there was no evidence of a trend in observed cloud cover in any season. These observations  
638 agree with the findings from the Austria study at the Hoher Sonnblick for 1997-2011 (Fitzka et al.,  
639 2012).

640  
641 The inverse correlation between  $H_{er}$  and cloud cover was also found to be strongly statistically  
642 significant for both sub-periods. However, while about half the variation in  $H_{er}$  was explained by  
643 the cloud cover variation in the first period this fell to just over one quarter for the second period.

644  
645 The same data examined on a season by season basis showed, for the first period, just over half  
646 the variation in  $H_{er}$  explained by the inverse relationship with cloud cover for spring, summer and  
647 autumn but only just over one quarter for winter, although the slope of the relationship did not  
648 vary greatly with season. For the second period, the variation in  $H_{er}$  explained by cloud cover  
649 dropped below 50% for all seasons and in particular the value for autumn (26%) reduced to  
650 below that for winter (29%). Although, the Austrian study at the Hoher Sonnblick did not study  
651 the correlation between cloud cover and UV measurements, the authors reported that the total  
652 cloud reduction of  $1.04\% y^{-1}$  was evident for UV measurements at SZA  $55^\circ$  for the period 1997-  
653 2011.

### 654 655 **4.4 Erythema effective UV radiant exposure ( $H_{er}$ ), total ozone and cloud cover**

656  
657 Given that we found clear evidence that variation in  $H_{er}$  could be partially explained by variation  
658 in total ozone and cloud cover separately we considered their combined effects. Over the whole  
659 period 1991- 2015 half of the variation in  $H_{er}$  could be explained by these two factors with the  
660 changes in cloud cover alone accounting for 37% of the variation in  $H_{er}$ , while the total ozone  
661 variation explained 14%. The unexplained half of the  $H_{er}$  variation may be attributed to other  
662 factors such as atmospheric aerosol, air pollution or climate. The RAF value was found to be -  
663 1.03 at constant levels of cloud cover. Although this RAF value was slightly different than that  
664 period between 1991 and 2004 (-0.79) and for 2004-2015 (-1.25) when cloud cover effect in the

665 model, but there was no statistically significant differences in the RAF values ( $p=0.66$ ). These  
666 RAF results are also consistent with the RAF values in the US study in which impact of clouds on  
667 the RAF was determined and the RAF ranged from a low of -0.80 to a high of -1.38 (Hall 2017).  
668

669 The effects of aerosols on surface UV irradiance have also been studied widely in addition to  
670 ozone and cloud in Europe (Román et al., 2015, De Bock et al., 2014, Zerefos et al., 2012, Fitzka  
671 et al., 2012). Our study, however, did not take account of the effects of aerosols because Chilton  
672 is situated in a very rural location in South Oxfordshire in the UK and the levels are generally  
673 very stable. The aerosols optical depth (AOD) trend in London was reported in the range of 0-  
674 0.004 per year decrease between 2003 and 2015 (Provençal et al., 2017).  
675

676 Aerosols can affect ground level UV irradiances directly through absorption and scattering solar  
677 radiation back out to space, reducing the amount of solar radiation reaching the surface of the  
678 Earth. Aerosols can also affect indirectly which are related to modify cloud formation.  
679 Atmospheric aerosols originate from both natural sources (such as dust) and from anthropogenic  
680 sources – such as air pollution from industry and traffic producing more pollution and  
681 atmospheric aerosol, in particular in urban areas. Alpert et al. (2012) reported that aerosols  
682 optical depth (AOD) trends declined over the largest cities in Europe during the period (2002-  
683 2010) owing to increasing air quality due to environmental regulations (2012). Nevertheless, the  
684 influence of the aerosols on UV irradiance has not been fully understood due to their high spatial  
685 and temporal variability (WMO 2007).  
686

687 In this work, the combined effects on a season by season basis the biggest proportion of  
688 variability in  $H_{er}$  explained by total ozone and cloud cover together was for spring (68%) while the  
689 smallest proportion was in winter for period 1991-2015. In each season cloud cover explained far  
690 more of the variability than did total ozone, based on the additive linear regression model was  
691 used.  
692

693 The combined effects of total ozone and cloud cover on  $H_{er}$  was also assessed using two linear  
694 trends with a node at 2004. Over the first period the proportion of  $H_{er}$  variability explained by  
695 these two factors rose a small amount (4%) but fell slightly for the second period (2%) compared  
696 to the proportion when the entire period 1991 to 2015 was considered as a whole.  
697

698 A major difference was seen in how much of the variability was explained by each factor across  
699 the two periods. In the first period cloud cover variation accounted for a lot more of the explained  
700 variability compared to ozone (47%:8%) whereas for the latter period the proportions were  
701 (16%:33%). This is because for the second period significant correlation between total ozone  $H_{er}$   
702 observed in winter and spring during 2008-2015 had a bigger impact on  $H_{er}$  than that in cloud  
703 cover for the same period.  
704

705 Across the seasons there were marked differences in the proportion of  $H_{er}$  variability explained  
706 by the two factors. For the period 1991-2004 in spring, the proportion explained rose to 82% but  
707 fell to only 31% in winter. However, for the latter period 2004-2015, the variability in  $H_{er}$  explained  
708 by the two factors was at a maximum in spring and winter (63% and 67% respectively) and at a  
709 minimum in summer and autumn (41% and 37% respectively).  
710

711 The season specific analysis of these data also showed that the size of the respective  
712 contributions that cloud cover and total ozone made to the variation in  $H_{er}$  changed between the  
713 two periods. For the first period, in spring and summer, cloud cover explained 65% and 63% of

714 the variability respectively compared to the 17% and 7% contributions of total ozone. For the  
715 second period in both winter and spring cloud cover explained 15% of the  $H_{er}$  variability while  
716 total ozone contributed 52% and 48% respectively.

717  
718 This study provides robust evidence that both increasing trend for the first period (1991-2004)  
719 and decreasing trend for the second period (2004-2015) in  $H_{er}$  occur at the same time as  
720 increasing total ozone. However, increasing trend in  $H_{er}$  over the first period is more strongly  
721 associated with the observed reduction in cloud cover, while there is no significant change in  
722 cloud cover over the second period that  $H_{er}$  is decreasing. All these changes are small and  
723 occur within a variable signal.

724  
725 Our findings from the first period partly agrees with those from the Austrian study at Hoher  
726 Sonnblick over the period 1997-2011, which reported that the significant increase in  $H_{er}$  was  
727 attributed to a decrease in cloud cover as well as aerosol optical depth (AOD) rather than a  
728 significant increase observed in ozone. However, the authors showed that the changes in the  
729 UVR at 305 nm with cloud cover were small and less significant due to the enhanced influence of  
730 ozone absorption at the shorter wavelengths (Fitzka et al., 2012). In addition, the Iberian  
731 Peninsula study based on data from nine locations in Spain also reported an increase in  
732 erythema effective ultraviolet irradiance between 1985 and 2011 and attributed that to changes in  
733 AOD and cloud cover rather than total ozone (Román et al., 2015).

734  
735 Some of the European monitoring sites have also demonstrated an overall increase in the  
736 reconstructed erythema effective UV irradiance observed for the period 1980-2006, two thirds  
737 could be attributed to diminishing cloud cover or AOD and only one third to the total ozone  
738 reduction (den Outer et al., 2010). The study over Canada, Europe and Japan during 1995-2006  
739 also showed that the decline of AOD and significant increase in total ozone were the associated  
740 with increased UV-B, although a non-significant trend with cloud cover was found (Zerefos et al.,  
741 2012). In contrast, the Belgian study reported individual contribution of insignificant negative  
742 trend AOD on erythemal UV dose was very low, while the impact from total ozone was strong  
743 (De Bock et al., 2014).

744  
745  
746 Our findings from the second period (2004-2015) appear to be partly consistent only with the  
747 findings over the period 2007-2011 by Zerefos et al., (2012) in which the authors reported that  
748 decreasing trends in the UV-B from 2007 to 2011 were largely driven by increasing total ozone  
749 and to a lesser degree of the significant AOD decrease but did not find a statistically significant  
750 trend in UV associated with cloud cover. The observed decreasing trend in  $H_{er}$  at Chilton for the  
751 second period (2004-2015) should be treated with caution because of the lack of other evidence  
752 of a decreasing trend in  $H_{er}$  data up to 2015 in the literature.

## 753 **Acknowledgements**

754  
755  
756 We wish to thank Ruth Petrie at the Centre for Environmental Data Analysis (CEDA) for all her  
757 help and providing us the cloud cover data from the Benson station at Oxfordshire. We would  
758 also like to express thanks to the Department for Environment, Food and Rural Affairs (DEFRA)  
759 for making total ozone data available on the air quality website. The authors would like to thank  
760 three anonymous reviewers for their constructive comments.

## 761 **References**

762  
763



764  
765 AGNIR (Advisory Group on Non-ionising Radiation): Health Effects from Ultraviolet Radiation,  
766 Report of an Advisory Group on Non-ionising Radiation. Documents of the NRPB 13:1, 2002.  
767

768 Alados-Arboledas, L., Alados, I., Foyo-Moreno, I., Olmo, F.J. and Alcántara, A.: The influence of  
769 clouds on surface UV erythemal irradiance. *Atmospheric Research*, 66(4), 273-290, doi:  
770 10.1002/joc.1883, 2003.  
771

772 Alpert, P., Shvainshtein, O., and Kishcha, P.: AOD trends over megacities based on space  
773 monitoring using MODIS and MISR, *Am. J. Clim. Change*, 12, 117-131,  
774 doi:10.4236/ajcc.2012.13010, 2012.  
775

776 Antón, M., Serrano, A., Cancillo, M. L. and García, J.A.: An empirical model to estimate  
777 ultraviolet erythemal transmissivity. *Ann. Geophys.*, 27, 1387–398, 2009.  
778

779 Bais, A. F., Kazadzis, S., Meleti, C., Kouremeti, N., Kaurola, J., Lakkala, K., Slaper, H., den  
780 Outer, P. N., Josefsson, W., Feister, U., and Janouch, M.: Variability in spectral UV radiation at  
781 seven European stations, edited by: Gröbner J., *One century of UV radiation research.*  
782 *Proceedings of the UV conference, Davos, Switzerland*, 1, 27–28, 2007.  
783

784 Bais, A. F., Tourpali, K., Kazantzidis, A., Akiyoshi, H., Bekki, S., Braesicke, P., Chipperfield, M.  
785 P., Dameris, M., Eyring, V., Garny, H., Iachetti, D., Jöckel, P., Kubin, A., Langematz, U., Mancini,  
786 E., Michou, M., Morgenstern, O., Nakamura, T., Newman, P. A., Pitari, G., Plummer, D. A.,  
787 Rozanov, E., Shepherd, T. G., Shibata, K., Tian, W., and Yamashita, Y.: Projections of UV  
788 radiation changes in the 21st century: impact of ozone recovery and cloud effects, *Atmos. Chem.*  
789 *Phys.*, 11, 7533–7545, doi:10.5194/acp-11-7533-2011, 2011.  
790

791 Beniston, M.: The 2003 heat wave in Europe: A shape of things to come? An analysis based on  
792 Swiss climatological data and model simulations, *Geophys. Res.Lett.*, 31, L02202,  
793 doi:10.1029/2003GL018857, 2004.

794 Calbó, J., Pagès, D., and González, J-B.: Empirical studies of cloud effects on UV radiation: A  
795 review. *Rev. Geophys.*, 43, RG2002, doi:10.1029/2004RG000155, 2005. Chatfield C.: *The*  
796 *analysis of time series: an introduction*, Sixth Edition, Chapman and Hall, CRC text in statistical  
797 science, 1996.

798 De Bock, V., De Backer, H., Van Malderen, R., Mangold, A., and Delcloo A.: Relations between  
799 erythemal UV dose, global solar radiation, total total ozonecolumn and aerosol optical depth at  
800 Uccle, Belgium, *Atmos. Chem. Phys.*, 14, 12251-12270, doi:10.5194/acp-14-12251-2014, 2014.  
801

802 den Outer, P. N., Slaper, H. and Tax, R.B.: UV radiation in the Netherlands: Assessing long-term  
803 variability and trends in relation to ozone and clouds. *J. Geophys. Res.*, 110, D02203,  
804 doi:10.1029/2004JD004824, 2005.  
805

806 den Outer, P. N., Slaper, H., Kaurola, J., Lindfors, A., Kazantzidis, A., Bais, A. F., Feister, U.,  
807 Junk, J., Janouch, M., and Josefsson, W.: Reconstructing of erythemal ultraviolet radiation levels  
808 in Europe for the past 4 decades, *J. Geophys. Res.*, 115, D10102, doi:10.1029/2009JD012827,  
809 2010.  
810

811 Diffey, B.L.: Sources and measurement of ultraviolet radiation, *Methods*, 28:4-13,  
812 doi:10.1016/S1046-2023(02)00204-9, 2002.  
813

814 Dunn, R. J. H., Willett, K. M., Thorne, P. W., Woolley, E. V., Durre, I., Dai, A., Parker, D. E.,  
815 and Vose, R. S.: HadISD: a quality-controlled global synoptic report database for selected

816 variables at long-term stations from 1973–2011, *Clim. Past*, 8, 1649–1679, doi:10.5194/cp-8-  
817 1649-2012, 2012.

818

819 Dunn, R. J. H., Willett, K. M., Morice, C. P., and Parker, D. E.: Pairwise homogeneity  
820 assessment of HadISD, *Clim. Past*, 10, 1501–1522, doi:10.5194/cp-10-1501-2014, 2014.

821

822 Dunn, R. J. H., Willett, K. M., Morice, C. P., and Parker, D. E.: Expanding HadISD: quality-  
823 controlled, sub-daily station data from 1931, *Geosci. Instrum. Method. Data Syst.*, 5, 473–491,  
824 doi:10.5194/gi-5-473-2016, 2016

825

826 Epplein, J., Thomas, S.A.: Vitamin D: It does a body good. *Annals of Long-Term Care* 18 (11), 39-  
827 45, 2010.

828

829 Eastman, R. and Warren, S. G.: A 39-yr survey of cloud changes from land stations worldwide  
830 1971–2009: long-term trends, relation to aerosols and expansion of the tropical belt, *Journal of*  
831 *Climate*, 26, 1286-1303. Doi:10.1175/JCLI-D-12-00280, 2013.

832

833 Farman, J.C., Gardiner, B.G., and, Shanklin, J.D.: Large losses of total ozone in Antarctica  
834 reveal seasonal ClO<sub>x</sub>/NO<sub>x</sub> interaction, *Nature*, 315, pages 207–210, 1985.

835

836 Fitzka, M., Simic, S., and Hadzimustafic, J.: Trends in spectral UV radiation from long-term  
837 measurements at Hoher Sonnblick, Austria, *Theor. Appl. Climatol.*, 110, 585–593,  
838 doi:10.1007/s00704-012-0684-0, 2012.

839

840 Fountoulakis, I., Bais, A.F., Fragkos, K., Meleti, C., Tourpali, K. and Zempila, M.M.: Short- and  
841 long-term variability of spectral solar UV irradiance at Thessaloniki, Greece: effects of changes in  
842 aerosols, total ozone and clouds. *Atmos. Chem. Phys.*, 16, 2493–2505, doi:10.5194/acp-16-  
843 2493, 2016.

844

845 Gies, P., Klekociuk, A., Tully, M., Henderson, S., Javorniczky, J., King, K., Lemus-Deschamps, L.  
846 & Makin, J.: Low ozone over Southern Australia in August 2011 and its impact on solar ultraviolet  
847 radiation levels. *Photochemistry and Photobiology*, 89, 984–994, doi:10.1111/php.12076, 2013.

848

849 Hall E.S.: Comparison of five modelling approaches to quantify and estimate the effect of clouds  
850 on the radiation amplification factors (RAF) for solar ultraviolet radiation. *Atmosphere*, 8, 153,  
851 doi.org/10.3390, 2017.

852

853 Harris, N.R., Kyrö, E., Staehelin, J., Brunner, D., Andersen, S.B., Godin-Beekmann, S.,  
854 Dhomse, S., Hadjinicolaou, P., Hansen, G., Isaksen, I. and Jrrar, A., 2008. Ozone trends at  
855 northern mid-and high latitudes—a European perspective. In *Annales Geophysicae* (Vol. 26,  
856 No. 5, pp. 1207-1220).

857

858 Helsel, D.R. and R.M. Hirsch.: *Statistical methods in water resources*. Studies in  
859 *Environmental Science* 49. New York: Elsevier, 1992.

860

861 Holick, M.F.: Vitamin D deficiency, *New England Journal of Medicine*, 357, 266–281, doi:  
862 10.1056/NEJMra070553, 2007.

863

864 Hooke, R.J., Hignett, M.P., Hunter, N., O’Hagan J.B.: Long term variations in erythema effective  
865 solar UV at Chilton, UK, from 1991 to 2015. *Photochemical & Photobiological sciences*, 16,  
866 1596-1603 doi: 10.1039/C7PP00053G, 2017.

867

868 Hooke, R.J., Hignett, M.P.: Temperature Correction of Historic Erythema Effective Solar Uv Data  
869 Resulting in a Continuous 25-Year Data Set at Chilton, UK, *Radiation Protection Dosimetry*, 175  
870 (3), 363-367, doi.org/10.1093/rpd/ncw358, 2016.

871  
872  
873 HPA (Health Protection Agency): Health Effects of Climate Change in the UK 2012. An update of  
874 the Department of Health report 2001/2002. Ed: Vardoulakis S & Heaviside C. Health Protection  
875 Agency (in partnership with the Department of Health), Chilton UK, ISBN 978-0-85951-723-2,  
876 2012.  
877  
878 Lucas, R.: World Health Organisation (WHO) report: Solar Ultraviolet Radiation. Environmental  
879 Burden of Disease Series, No. 17, World Health Organization, Geneva, ISBN 978 92 4 159917 7,  
880 2010.  
881  
882 McKenzie, R.L., Liley, J.B., Björn, L.O.: UV radiation: Balancing risks and benefits,  
883 *Photochemistry and Photobiology* 85(1), 88–98, doi.org/10.1111/j.1751-1097, 2009.

884 Mann, H.B.: Non-parametric tests against trend, *Econometrica* 13:163-171, 1945.

885 Kendall, M.G.: Rank Correlation Methods, 4th edition, Charles Griffin, London, 1975.

886 Norris, J. R., Slingo, A.: Trends in observed cloudiness and Earth's radiation budget what do we  
887 not know and what do we need to know?, *in* Clouds in the Perturbed Climate System, edited by  
888 J. Heintzenberg and R. J. Charlson, pp. 17–36, MIT Press, Cambridge, Mass, 2009.  
889  
890 Norval, M., Lucas, R.M., Cullen, A.P., de Gruijl, F.R., Longstreth, J., Takizawa, Y., van der Leun,  
891 J.C.: The Human Health Effects of Ozone Depletion and Interactions with Climate Change.  
892 *Photochemical & Photobiological Sciences* 10, 199-225, doi: 10.1039/C0PP90044C, 2011.  
893  
894 Provençal, S., Kishcha, P., da Silva, A.M., Elhacham, E., and Alpert, P.: AOD distributions and  
895 trends of major aerosol species over a selection of the world's most populated cities based on  
896 the 1st Version of NASA's MERRA Aerosol Reanalysis, *Urban Clim*, 20, 168-191.  
897 doi:10.1016/j.uclim.2017.04.001, 2017.  
898  
899 Román, R., Bilbao, J., de Miguel, A.: Erythemal ultraviolet irradiation trends in the Iberian  
900 Peninsula from 1950 to 2011, *Atmospheric Chemistry and Physics*, 15, 375-391,  
901 doi:10.5194/acp-15-375-2015, 2015.  
902  
903 Smedley, A. R. D., Rimmer, J. S., Moore, D., Toumi, R., and Webb, A. R.: Total ozone and  
904 surface UV trends in the United Kingdom: 1979–2008, *Int. J. Climatol.*, 32, 338–346,  
905 doi:10.1002/joc.2275, 2012.  
906  
907 UNEP (United Nations Environment Programme ): Environmental effects of ozone depletion and  
908 its interactions with climate change: 2010 assessment, 236 pp., UNEP, Nairobi, Kenya,  
909 ISBN:ISBN 92-807-2312-X, 2010.  
910  
911 Waugh, D.W., Oman, L., Kawa, S.R., Stolarski, R.S., Pawson, S., Douglass, A.R., Newman,  
912 P.A., Nielsen, J.E.: Impacts of climate change on stratospheric ozone recovery, *Geophysical*  
913 *Research Letters*, 36, doi:10.1029/2008GL036223, 2009.  
914  
915 WHO (World Health Organisation): Solar Ultraviolet Radiation. Global burden of disease from  
916 solar ultraviolet radiation. Environmental Burden of Disease Series, No. 13. World Health  
917 Organization. Geneva, ISBN: 92 4 159440 3, 2006.  
918  
919 WMO: (World Meteorological Organization): Scientific Assessment of Ozone Depletion: 2006,  
920 Global ozone Research and Monitoring Project-Report No. 50, Geneva, Switzerland, 2007.  
921  
922 WMO: (World Meteorological Organization): Scientific Assessment of Ozone Depletion: 2014,  
923 Global ozone Research and Monitoring Project-Report No. 55, Geneva, Switzerland, 2014.  
924

- 925 Wong, C.C., Liu, W., Gies, P. and Nixon, R., 2015. Think UV, not heat!. *Australasian Journal of*  
926 *Dermatology*, 56(4), pp.275-278.
- 927 Young, C.: Solar ultraviolet radiation and skin cancer, *Occupational Medicine* 59, 82-88, doi:  
928 10.1093/occmed/kqn170, 2009.
- 929 Zerefos, C. S., Tourpali, K., Eleftheratos, K., Kazadzis, S., Meleti, C., Feister, U., Koskela, T.,  
930 and Heikkilä, A.: Evidence of a possible turning point in solar UV-B over Canada, Europe and  
931 Japan, *Atmos. Chem. Phys.*, 12, 2469–2477, doi:10.5194/acp-12-2469-2012, 2012.  
932
- 933 Vieno M., Dore A., Stevenson D. S., Doherty R., Heal M. R., Reis S., et al.: Modelling surface  
934 ozone during the 2003 heat-wave in the UK, *Atmos. Chem. Phys.*, 10(16), 7963–7978,  
935 doi.org/10.5194/acp-10-7963-2010, 2010.

**Table 1:** Daily  $H_{er}$  ( $J m^{-2}$ ) averaged over the whole period and for each season in Chilton during 1991-2015.

|                   | <b>Min</b> | <b>Mean</b> | <b>Median</b> | <b>Stdev.</b> | <b>Max</b> |
|-------------------|------------|-------------|---------------|---------------|------------|
| Whole data        | 10         | 1294        | 917           | 1179          | 5655       |
| Winter (Dec-Feb)  | 10         | 188         | 140           | 148           | 933        |
| Spring (Mar-May)  | 84         | 1606        | 1463          | 943           | 4880       |
| Summer (June-Aug) | 212        | 2617        | 2552          | 944           | 5655       |
| Autumn (Sep-Nov)  | 23         | 746         | 540           | 618           | 2913       |

**Table 2:** Estimated trends (in %,  $y^{-1}$ ) for  $H_{er}$  with 95% confidence intervals (CI) at Chilton for two sub-periods: 1991-2004 and 2004-2015.

|                     | Study period                |         |                             |         |
|---------------------|-----------------------------|---------|-----------------------------|---------|
|                     | 1991-2004                   |         | 2004-2015                   |         |
|                     | Estimated trend<br>(95% CI) | p-value | Estimated trend<br>(95% CI) | p-value |
| Monthly data        | 1.01 (0.48; 1.54)           | <0.001  | -1.35 (-1.98; -0.77)        | <0.001  |
| Winter (Dec.-Feb.)  | 1.29 (0.17; 2.41)           | 0.03    | -1.08 (-3.14; 1.02)         | 0.24    |
| Spring (Mar.-April) | 0.84 (-0.40; 2.05)          | 0.22    | -0.88 (-2.10; -0.34)        | 0.16    |
| Summer (June-Aug.)  | 0.74 (-0.15; 1.76)          | 0.09    | -1.67 (-2.48; -0.86)        | <0.001  |
| Autumn (Sep.-Nov.)  | 0.98 (-0.04; 2.00)          | 0.07    | -1.56 (-2.68; -0.44)        | 0.01    |

**Table 3:** Estimated trends (in %,  $y^{-1}$ ) for total ozone with 95% CI at southern England for the monthly mean deviation data and for each season using various study periods.

|            | Study period                |         |                             |         |                             |         |
|------------|-----------------------------|---------|-----------------------------|---------|-----------------------------|---------|
|            | 1991-2015                   |         | 1991-2004                   |         | 2004-2015                   |         |
|            | Estimated trend<br>(95% CI) | p-value | Estimated trend<br>(95% CI) | p-value | Estimated trend<br>(95% CI) | p-value |
| Whole data | 0.17 (0.09; 0.25)           | <0.001  | 0.19 (-0.006; 0.38)         | 0.06    | 0.28 (0.03; 0.53)           | 0.03    |
| Winter     | 0.43 (0.19; 0.67)           | <0.001  | 0.31 (-0.20; 0.82)          | 0.24    | 0.66 (-0.14; 1.59)          | 0.10    |
| Spring     | 0.15 (-0.02; 0.32)          | 0.09    | 0.22 (-0.16; 0.64)          | 0.29    | 0.06 (-0.41; 0.53)          | 0.80    |
| Summer     | 0.03 (-0.07; 0.13)          | 0.52    | 0.02 (-0.21; 0.25)          | 0.87    | 0.13 (-0.09; 0.35)          | 0.26    |
| Autumn     | 0.05 (-0.07; 0.23)          | 0.27    | 0.05 (-0.30; 0.40)          | 0.78    | 0.26 (-0.17; 0.69)          | 0.24    |

**Table 4:** Estimated effect of total ozone on  $H_{er}$  with 95% confidence interval based on three study periods (CI).

|            | 1991-2015            |           | 1991-2004            |           | 2004-2015            |           |
|------------|----------------------|-----------|----------------------|-----------|----------------------|-----------|
|            | Estimate (95% CI)    | $r^2$ (%) | Estimate (95% CI)    | $r^2$ (%) | Estimate (95% CI)    | $r^2$ (%) |
| Whole data | -1.33 (-1.60; -1.06) | 25        | -1.18 (-1.57;-0.79)  | 18        | -1.50 (-1.85; -1.15) | 33        |
| Winter     | -0.94 (-1.37; -0.51) | 19        | -0.54 (-1.23; 0.15)# | 6         | -1.66 (-2.19; -1.13) | 52        |
| Spring     | -1.88 (-2.39; -1.37) | 41        | -1.78 (-2.50; -1.06) | 37        | -1.87 (-2.54; -1.20) | 48        |
| Summer     | -2.37 (-3.13; -1.61) | 34        | -2.47 (-3.35; -1.59) | 42        | -2.18 (-3.49; -0.87) | 24        |
| Autumn     | -1.39 (-2.00; -0.78) | 21        | -1.57 (-2.37; -0.77) | 27        | -1.19 (-2.07; -0.31) | 17        |

#:  $p=0.12$ ;



**Table 5:** Estimated effect of cloud cover on  $H_{er}$  (%) with 95% CI, based on three study periods.

|            | 1991-2015            |           | 1991-2004            |           | 2004-2015            |           |
|------------|----------------------|-----------|----------------------|-----------|----------------------|-----------|
|            | Estimate (95% CI)    | $r^2$ (%) | Estimate (95% CI)    | $r^2$ (%) | Estimate (95% CI)    | $r^2$ (%) |
| Whole data | -0.95 (-1.09; -0.81) | 38        | -1.06 (-1.23;-0.89)  | 48        | -0.82 (-1.04; -0.60) | 27        |
| Winter     | -1.09 (-1.50; -0.68) | 27        | -0.96 (-1.47; -0.45) | 25        | -1.20 (-1.83; -0.57) | 29        |
| Spring     | -1.05 (-1.30; -0.80) | 48        | -1.20 (-1.47; -0.93) | 66        | -0.99 (-1.38; -0.60) | 42        |
| Summer     | -0.73 (-0.90; -0.54) | 46        | -0.92 (-1.14; -0.70) | 64        | -0.53 (-0.78; -0.28) | 31        |
| Autumn     | -1.05 (-1.34; -0.76) | 41        | -1.15 (-1.48; -0.82) | 53        | -0.87 (-1.36; -0.38) | 26        |

**Table 6:** Estimated effect on  $H_{er}$  with 95% CI from the combined effect of both total ozone and cloud cover trend for the period 1991-2015.

|            | <b>total ozone<br/>(95% CI)</b> | <b>cloud cover<br/>(95% CI)</b> | <b><math>r^2</math> (%)</b> |
|------------|---------------------------------|---------------------------------|-----------------------------|
| Whole data | -1.03 (-1.25; -0.81)            | -0.82 (-0.94; -0.70)            | 51                          |
| Winter     | -0.85 (-1.22; -0.48)            | -1.02 (-1.39; -0.65)            | 42                          |
| Spring     | -1.41 (-1.81; -1.01)            | -0.84 (-1.06; -0.62)            | 68                          |
| Summer     | -1.38 (-2.09; -0.67)            | -0.56 (-0.76; -0.36)            | 55                          |
| Autumn     | -0.98 (-1.49; -0.47)            | -0.92 (-1.19; -0.65)            | 51                          |

**Table 7:** Estimated effect on  $H_{er}$  with 95% CI from the combined effect of total ozone and cloud cover trend for two sub-periods: 1991-2004 and 2004-2015.

|            | 1991-2004               |                         |           | 2004-2015               |                         |           |
|------------|-------------------------|-------------------------|-----------|-------------------------|-------------------------|-----------|
|            | cloud cover<br>(95% CI) | total ozone<br>(95% CI) | $r^2$ (%) | cloud cover<br>(95% CI) | total ozone<br>(95% CI) | $r^2$ (%) |
| Whole data | -0.97(-1.13; -0.81)     | -0.79 (-1.26; -0.68)    | 55        | -0.65 (-0.85; -0.45)    | -1.25 (-1.56; -0.94)    | 49        |
| Winter     | -0.96 (-1.45; -0.47)    | -0.55 (-1.14; 0.04)*    | 31        | -0.89 (-1.34; -0.44)    | -1.45 (-1.92; -0.98)    | 67        |
| Spring     | -1.04 (-1.26; -0.82)    | -1.26 (-1.67; -0.85)    | 82        | -0.66 (-1.01; -0.31)    | -1.36 (-1.99; -0.73)    | 63        |
| Summer     | -0.73 (-0.97; -0.49)    | -1.17 (-1.56; -0.78)    | 70        | -0.41 (-0.76; -0.06)    | -1.45 (-2.70; -0.20)    | 41        |
| Autumn     | -1.00 (-1.31; -0.69)    | -1.03 (-1.64; -0.42)    | 64        | -0.77 (-1.24; -0.30)    | -0.97 (-1.75; -0.19)    | 37        |

\*: p-value=0.07

Figure 1:

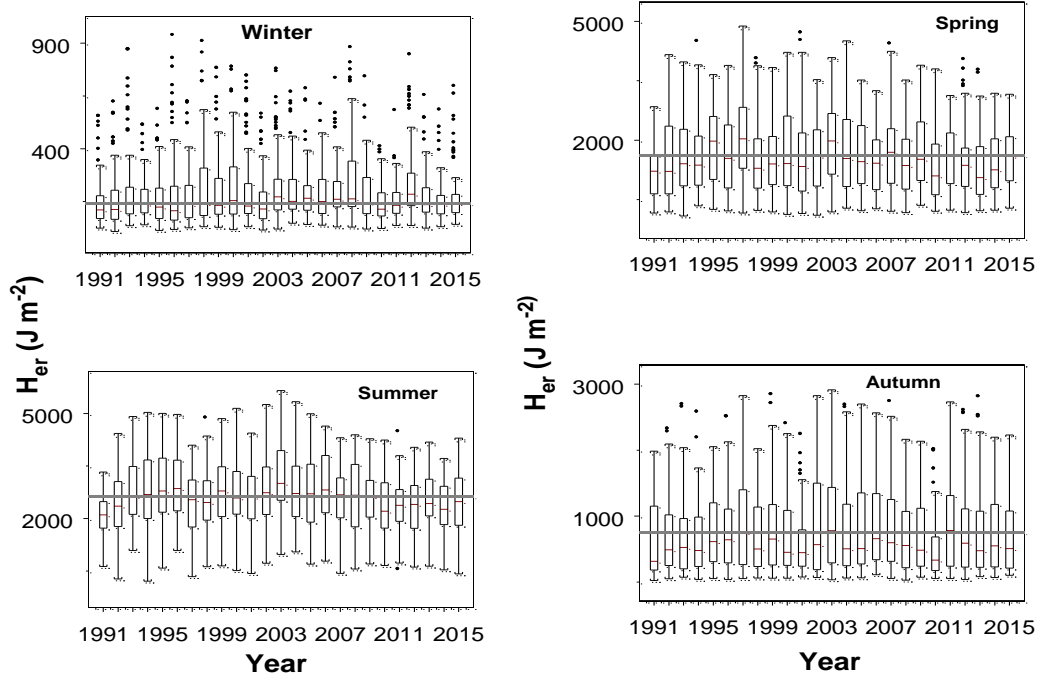

Figure 2:

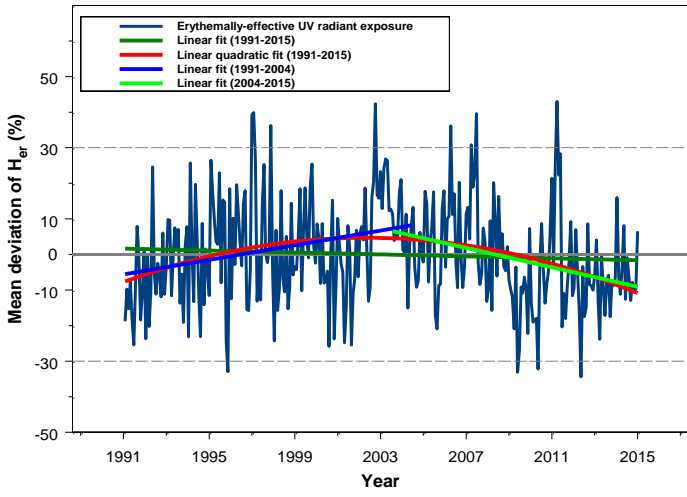

(a)

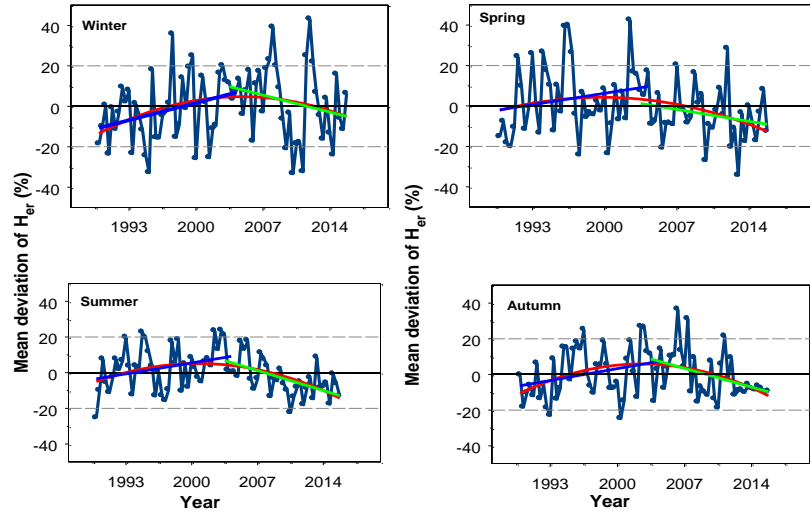

(b)

Figure 3:

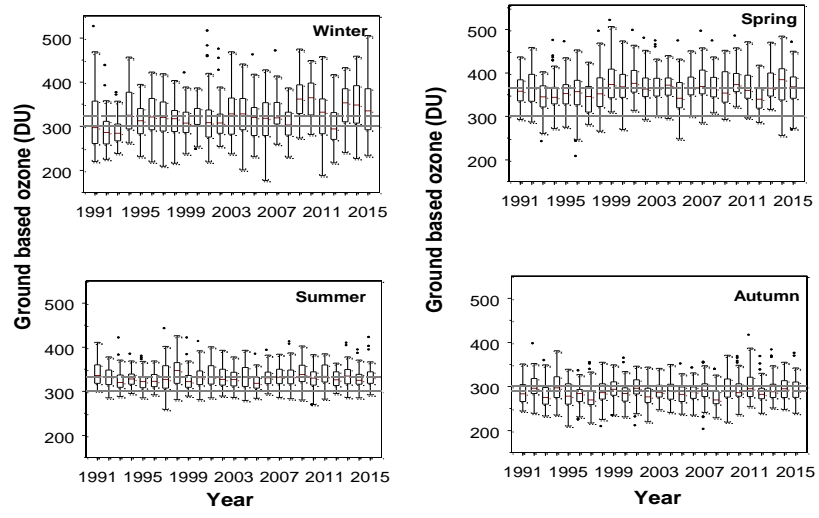

(a)

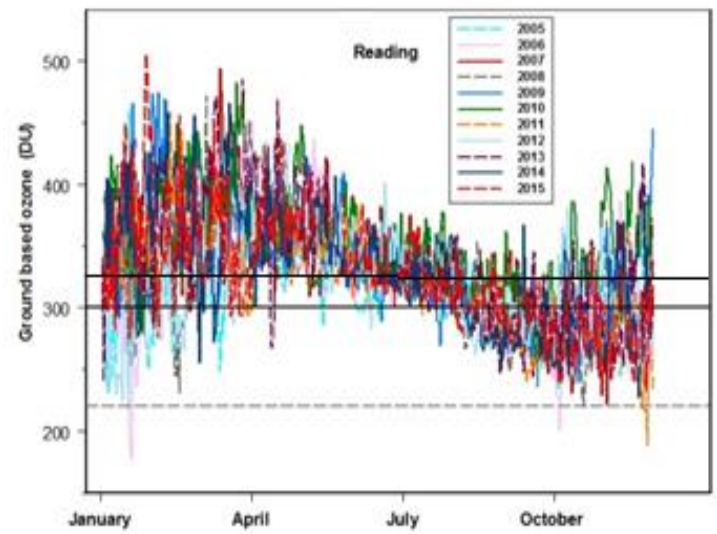

(b)

Figure 4:

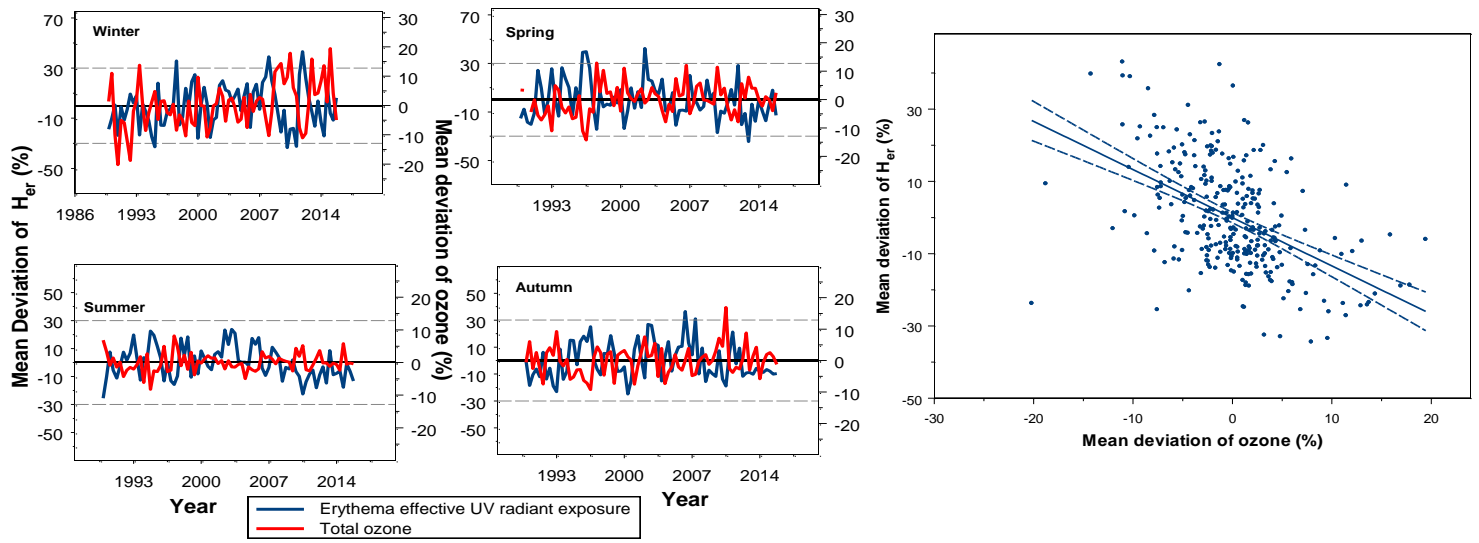

(a)

(b)

Figure 5:

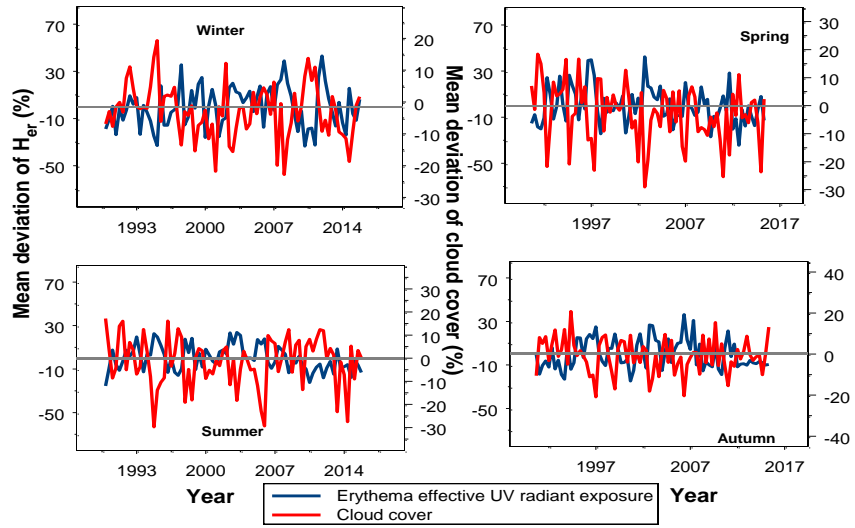

(a)

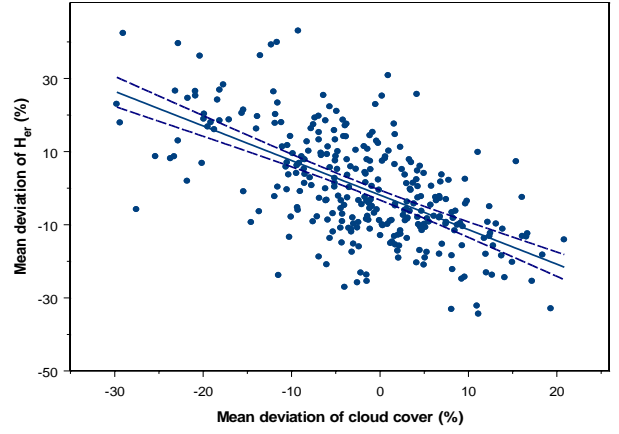

(b)
